# Supplementary material
Source: HighWire-hosted journal article supplement (https://diabetes.diabetesjournals.org/content/suppl/2004/09/28/53.10.2709)
Supplement: DB000395OnlineAppendix.pdf [file DB000395OnlineAppendix.pdf]

| #  | dbSNP 121  | DIL#    | DIL name | NCBI build 34 | Location               | Alleles | Allele Frequency | P, Hardy-Weinberg | Transmitted | Non-Transmitted | %T   | P tdt | P gtrr |
|----|------------|---------|----------|---------------|------------------------|---------|------------------|-------------------|-------------|-----------------|------|-------|--------|
| 1  | rs2544038  | DIL1450 | U+20095  | 46,501,500    | centomeric to VDR gene | A/G     | 57.1             | 0.25              | 565         | 603             | 48.4 | 0.28  | 0.26   |
| 2  | rs1859281  | DIL1449 | U+19579  | 46,502,016    | centomeric to VDR gene | C/T     | 6.9              | 0.61              | 165         | 163             | 50.3 | 0.91  | 0.74   |
| 3  | rs2544028  | DIL1448 | U+18898  | 46,502,697    | centomeric to VDR gene | A/T     | 40.6             | 0.28              | 582         | 549             | 51.5 | 0.34  | 0.42   |
| 4  | rs2544027  | DIL1447 | U+18799  | 46,502,796    | centomeric to VDR gene | C/T     | 46.4             | 0.15              | 606         | 570             | 51.5 | 0.30  | 0.28   |
| 5  | rs11168256 | DIL1446 | U+18315  | 46,503,280    | centomeric to VDR gene | C/T     | 72.7             | 0.71              | 477         | 492             | 49.2 | 0.64  | 0.88   |
| 6  | rs12721361 | DIL1437 | U+11191  | 46,510,399    | centomeric to VDR gene | A/C     | 1.4              | 1.00              | 38          | 31              | 55.1 | 0.43  | 0.44   |
| 7  | rs12721362 | DIL1463 | U+9581   | 46,512,009    | centomeric to VDR gene | A/G     | 69.3             | 1.00              | 508         | 522             | 49.3 | 0.67  | 0.72   |
| 8  | rs12721363 | DIL1462 | U+8981   | 46,512,609    | centomeric to VDR gene | C/T     | 1.0              | 1.00              | 27          | 25              | 51.9 | 0.78  | 0.78   |
| 9  | rs12721364 | DIL1458 | U+3893   | 46,517,697    | centomeric to VDR gene | C/T     | 85.7             | 0.78              | 194         | 186             | 51.1 | 0.69  | 0.29   |
| 10 | rs7965281  | DIL1457 | U+3713   | 46,517,877    | centomeric to VDR gene | C/T     | 48.7             | 0.16              | 629         | 587             | 51.7 | 0.25  | 0.22   |
| 11 | rs10783215 | DIL1455 | U+3425   | 46,518,165    | centomeric to VDR gene | A/G     | 48.9             | 0.30              | 441         | 404             | 52.2 | 0.23  | 0.46   |
| 12 | rs7968585  | DIL1454 | U+3230   | 46,518,360    | centomeric to VDR gene | A/G     | 49.2             | 0.69              | 377         | 347             | 52.1 | 0.28  | 0.41   |
| 13 | rs6580639  | DIL1453 | U+3151   | 46,518,439    | centomeric to VDR gene | A/G     | 3.9              | 0.39              | 46          | 63              | 42.2 | 0.12  | 0.13   |
| 14 | rs11574139 | DIL1340 | E9+3234  | 46,521,822    | exon 9                 | A/T     | 3.2              | 0.06              | 50          | 45              | 52.6 | 0.62  | -      |
| 15 | rs2853563  | DIL1338 | E9+3051  | 46,522,005    | exon 9                 | G/A     | 96.8             | 1.00              | 47          | 57              | 45.2 | 0.33  | -      |
| 16 | rs2853562  | DIL1336 | E9+2403  | 46,522,653    | exon 9                 | A/T     | 47.0             | 0.05              | 429         | 403             | 51.6 | 0.39  | 0.52   |
| 17 | rs2544043  | DIL1331 | E9+2239  | 46,522,817    | exon 9                 | G/C     | 7.3              | 1.00              | 100         | 132             | 43.1 | 0.03  | 0.09   |
| 18 | rs9729     | DIL1330 | E9+2166  | 46,522,890    | exon 9                 | A/C     | 47.3             | 0.09              | 438         | 414             | 51.4 | 0.43  | 0.47   |
| 19 | rs3847987  | DIL1346 | E9+721   | 46,524,335    | exon 9                 | G/T     | 90.1             | 0.25              | 145         | 144             | 50.2 | 0.96  | 0.90   |
| 20 | rs11574119 | DIL1345 | E9+697   | 46,524,359    | exon 9                 | C/G     | 3.1              | 0.07              | 70          | 71              | 49.6 | 0.94  | 0.81   |
| 21 | rs739837   | DIL1343 | E9+568   | 46,524,488    | exon 9                 | A/C     | 52.8             | 0.15              | 400         | 439             | 47.7 | 0.20  | 0.20   |
| 22 | rs731236   | DIL1339 | TaqI     | 46,525,024    | exon 9                 | T/C     | 39.6             | 0.24              | 321         | 337             | 48.8 | 0.54  | 0.28   |
| 23 | rs7975232  | DIL1321 | Apal     | 46,525,104    | intron                 | G/T     | 47.0             | 0.07              | 449         | 415             | 52.0 | 0.28  | 0.43   |
| 24 | rs757343   | DIL1402 | I8+443   | 46,525,942    | intron                 | A/G     | 11.4             | 0.84              | 264         | 234             | 53.0 | 0.20  | 0.43   |
| 25 | rs1544410  | DIL1322 | BsmI     | 46,526,102    | intron                 | A/G     | 41.7             | 0.09              | 340         | 379             | 47.3 | 0.16  | 0.32   |
| 26 | rs12721365 | DIL1324 | E8+2     | 46,526,500    | exon 8                 | C/T     | 99.5             | 1.00              | 11          | 6               | 64.7 | 0.32  | 0.32   |
| 27 | rs12721366 | DIL5012 | I6+3824  | 46,531,856    | intron                 | A/G     | 1.1              | 1.00              | 37          | 19              | 66.1 | 0.01  | 0.01   |
| 28 | rs7305032  | DIL1388 | I5+1052  | 46,536,127    | intron                 | C/T     | 56.9             | 0.18              | 594         | 600             | 49.7 | 0.87  | 0.65   |
| 29 | rs11574085 | DIL5011 | I5+118   | 46,537,061    | intron                 | A/T     | 94.3             | 0.09              | 119         | 136             | 46.7 | 0.32  | 0.24   |
| 30 | rs12721367 | DIL1387 | I4+211   | 46,537,343    | intron                 | A/G     | 97.6             | 1.00              | 38          | 35              | 52.1 | 0.74  | 1.00   |
| 31 | rs2238140  | DIL1383 | I3+6166  | 46,538,931    | intron                 | C/T     | 52.2             | 0.30              | 573         | 614             | 48.3 | 0.25  | 0.43   |
| 32 | rs12370156 | DIL1381 | I3+4697  | 46,540,400    | intron                 | A/G     | 52.1             | 0.24              | 582         | 614             | 48.7 | 0.37  | 0.55   |
| 33 | rs2283343  | DIL1379 | I3+4052  | 46,541,045    | intron                 | C/T     | 48.9             | 0.29              | 392         | 351             | 52.8 | 0.15  | 0.11   |
| 34 | rs2239182  | DIL1378 | I3+3419  | 46,541,678    | intron                 | A/G     | 48.6             | 1.00              | 633         | 599             | 51.4 | 0.35  | 0.35   |
| 35 | rs2107301  | DIL1377 | I3+3260  | 46,541,837    | intron                 | C/T     | 75.6             | 0.11              | 275         | 273             | 50.2 | 0.94  | 0.80   |
| 36 | rs2239181  | DIL1375 | I3+2881  | 46,542,216    | intron                 | G/T     | 89.7             | 0.70              | 223         | 231             | 49.1 | 0.71  | 0.93   |
| 37 | rs2239180  | DIL1373 | I3+2784  | 46,542,313    | intron                 | C/G     | 8.8              | 0.03              | 159         | 181             | 46.8 | 0.25  | 0.47   |
| 38 | rs2238139  | DIL1372 | I3+2550  | 46,542,547    | intron                 | C/T     | 20.6             | 0.83              | 263         | 253             | 51.0 | 0.67  | 0.48   |
| 39 | rs12721368 | DIL1371 | I3+1577  | 46,543,520    | intron                 | A/G     | 0.1              | 1.00              | 2           | 2               | 50.0 | 1.00  | 1.00   |
| 40 | rs1540339  | DIL1370 | I3+1504  | 46,543,593    | intron                 | A/G     | 65.1             | 0.38              | 335         | 375             | 47.2 | 0.14  | 0.15   |

| #  | dbSNP 121  | DIL#    | DIL name | NCBI build 34 | Location | Alleles | Allele Frequency | P, Hardy-Weinberg | Transmitted | Non-Transmitted | %T   | P tdt | P gtrr |
|----|------------|---------|----------|---------------|----------|---------|------------------|-------------------|-------------|-----------------|------|-------|--------|
| 41 | rs12721369 | DIL1350 | I2+10847 | 46,548,171    | intron   | A/G     | 0.5              | 1.00              | 16          | 8               | 66.7 | 0.12  | 0.11   |
| 42 | rs12721370 | DIL1349 | I2+10678 | 46,548,340    | intron   | G/T     | 89.7             | 0.86              | 152         | 140             | 52.1 | 0.50  | 0.49   |
| 43 | rs886441   | DIL1368 | I2-4004  | 46,549,231    | intron   | C/T     | 18.8             | 0.35              | 378         | 369             | 50.6 | 0.75  | 0.77   |
| 44 | rs2189480  | DIL1365 | I2+8923  | 46,550,095    | intron   | A/C     | 36.9             | 0.68              | 568         | 560             | 50.4 | 0.81  | 0.90   |
| 45 | rs2238138  | DIL1364 | I2+8258  | 46,550,760    | intron   | C/T     | 33.9             | 0.26              | 510         | 548             | 48.2 | 0.22  | 0.22   |
| 46 | rs12721371 | DIL1360 | I2+6781  | 46,552,237    | intron   | A/T     | 98.9             | 1.00              | 16          | 21              | 43.2 | 0.51  | 0.51   |
| 47 | rs3782905  | DIL1359 | I2+6584  | 46,552,434    | intron   | C/G     | 32.4             | 0.55              | 309         | 355             | 46.5 | 0.06  | 0.14   |
| 48 | rs12721372 | DIL1353 | I2+2953  | 46,556,065    | intron   | A/G     | 83.2             | 0.48              | 225         | 203             | 52.6 | 0.31  | 0.56   |
| 49 | rs7974708  | DIL1352 | I2+2586  | 46,556,432    | intron   | A/G     | 64.0             | 0.53              | 546         | 524             | 51.0 | 0.49  | 0.68   |
| 50 | rs6580642  | DIL1351 | I2+2155  | 46,556,863    | intron   | A/G     | 84.4             | 0.31              | 217         | 197             | 52.4 | 0.35  | 0.56   |
| 51 | rs11168275 | DIL1355 | I2+476   | 46,558,542    | intron   | A/G     | 21.2             | 0.05              | 281         | 228             | 55.2 | 0.02  | 0.06   |
| 52 | rs11574050 | DIL4026 | I2+290   | 46,558,728    | intron   | C/T     | 5.7              | 0.18              | 86          | 85              | 50.3 | 0.93  | 0.80   |
| 53 | rs10783218 | DIL1363 | I2+8     | 46,559,010    | intron   | T/C     | 96.4             | 1.00              | 54          | 55              | 49.5 | 0.92  | 0.53   |
| 54 | rs11574048 | DIL4025 | E2+59    | 46,559,107    | exon 2   | C/T     | 2.5              | 0.43              | 40          | 41              | 49.4 | 0.92  | 0.58   |
| 55 | rs10735810 | DIL1348 | FokI     | 46,559,162    | exon 2   | T/C     | 59.6             | 0.21              | 420         | 379             | 52.6 | 0.14  | 0.06   |
| 56 | rs2408876  | DIL1421 | P-667    | 46,559,832    | intron   | A/G     | 37.8             | 0.11              | 43          | 29              | 59.7 | 0.18  | 0.41   |
| 57 | rs11574046 | DIL1434 | P-916    | 46,560,081    | intron   | A/G     | 93.1             | 0.43              | 107         | 84              | 56.0 | 0.07  | 0.17   |
| 58 | rs12721373 | DIL1415 | P-2109   | 46,561,274    | intron   | A/T     | 12.2             | 0.52              | 158         | 167             | 48.6 | 0.64  | 0.89   |
| 59 | rs1989969  | DIL1417 | P-5112   | 46,564,277    | intron   | A/T     | 40.9             | 0.59              | 574         | 589             | 49.4 | 0.65  | 0.77   |
| 60 | rs2238135  | DIL1418 | P-5292   | 46,564,457    | intron   | C/G     | 24.1             | 0.64              | 286         | 302             | 48.6 | 0.47  | 0.75   |
| 61 | rs2853564  | DIL1419 | P-5589   | 46,564,754    | intron   | C/T     | 59.9             | 0.88              | 392         | 361             | 52.1 | 0.24  | 0.34   |
| 62 | rs12721374 | DIL4044 | P-6030   | 46,565,195    | intron   | A/G     | 99.2             | 0.08              | 16          | 11              | 59.3 | 0.40  | 0.40   |
| 63 | rs7965266  | DIL1423 | P-7236   | 46,566,401    | intron   | A/T     | 41.3             | 0.82              | 559         | 588             | 48.7 | 0.38  | 0.42   |
| 64 | rs7965274  | DIL1424 | P-7269   | 46,566,434    | intron   | A/G     | 60.2             | 0.94              | 392         | 361             | 52.1 | 0.23  | 0.32   |
| 65 | rs12321826 | DIL1425 | P-7456   | 46,566,621    | intron   | A/G     | 7.0              | 0.02              | 155         | 156             | 49.8 | 0.95  | 0.52   |
| 66 | rs7979131  | DIL1426 | P-7557   | 46,566,722    | intron   | A/C     | 40.1             | 1.00              | 357         | 368             | 49.2 | 0.67  | 0.24   |
| 67 | rs4760648  | DIL4043 | P-7767   | 46,566,932    | intron   | A/G     | 57.1             | 0.43              | 342         | 371             | 48.0 | 0.27  | 0.28   |
| 68 | rs10875694 | DIL1432 | P-8762   | 46,567,927    | intron   | A/T     | 16.5             | 0.80              | 210         | 221             | 48.7 | 0.57  | 0.43   |
| 69 | rs11168283 | DIL1435 | P-9504   | 46,568,669    | intron   | A/G     | 64.6             | 0.82              | 368         | 373             | 49.7 | 0.85  | 0.37   |
| 70 | rs12721375 | DIL1403 | P-10002  | 46,569,167    | intron   | C/T     | 14.0             | 0.18              | 180         | 181             | 49.9 | 0.96  | 0.92   |
| 71 | rs11168284 | DIL1404 | P-10151  | 46,569,316    | intron   | C/T     | 64.1             | 0.70              | 318         | 343             | 48.1 | 0.33  | 0.27   |
| 72 | rs12721376 | DIL5013 | P-10795  | 46,569,960    | intron   | C/G     | 96.0             | 0.21              | 90          | 102             | 46.9 | 0.40  | 0.25   |
| 73 | rs7965943  | DIL1407 | P-10858  | 46,570,023    | intron   | A/C     | 40.0             | 0.89              | 332         | 343             | 49.2 | 0.66  | 0.69   |
| 74 | rs7966244  | DIL1412 | P-11384  | 46,570,549    | intron   | A/T     | 97.7             | 1.00              | 43          | 29              | 59.7 | 0.14  | 0.21   |
| 75 | rs3922882  | DIL1413 | P-12070  | 46,571,235    | intron   | C/G     | 45.2             | 0.05              | 335         | 383             | 46.7 | 0.06  | 0.15   |
| 76 | rs11168287 | DIL6329 | P-12516  | 46,571,681    | intron   | C/T     | 49.1             | 0.10              | 424         | 413             | 50.7 | 0.70  | 0.77   |
| 77 | rs12721377 | DIL5005 | 1B-1968  | 46,581,618    | intron   | A/G     | 97.2             | 1.00              | 74          | 58              | 56.1 | 0.13  | 0.13   |
| 78 | rs12717994 | DIL4856 | 1D+2175  | 46,582,535    | intron   | A/G     | 69.8             | 0.39              | 311         | 334             | 48.2 | 0.36  | 0.56   |
| 79 | rs11574005 | DIL5004 | 1A-751   | 46,585,837    | intron   | A/G     | 2.8              | 1.00              | 59          | 74              | 44.4 | 0.16  | 0.16   |
| 80 | rs4516035  | DIL1311 | 1A-1007  | 46,586,093    | intron   | A/G     | 40.6             | 0.67              | 389         | 376             | 50.8 | 0.64  | 0.73   |

| #  | dbSNP 121  | DIL#    | DIL name | NCBI build 34 | Location              | Alleles | Allele Frequency | P, Hardy-Weinberg | Transmitted | Non-Transmitted | %T   | P tdt | P gtr |
|----|------------|---------|----------|---------------|-----------------------|---------|------------------|-------------------|-------------|-----------------|------|-------|-------|
| 81 | rs7139166  | DIL1313 | 1A-1515  | 46,586,601    | intron                | C/G     | 57.6             | 0.42              | 362         | 381             | 48.7 | 0.48  | 0.78  |
| 82 | rs11568820 | DIL6243 | Cdx2     | 46,588,812    | intron                | A/G     | 79.2             | 0.54              | 249         | 245             | 50.4 | 0.86  | 0.83  |
| 83 | rs10459217 | DIL4854 | 1F+20593 | 46,602,528    | intron                | A/G     | 21.5             | 0.92              | 279         | 277             | 50.2 | 0.93  | 0.99  |
| 84 | rs6580645  | DIL4853 | 1F+15831 | 46,607,290    | intron                | C/T     | 66.9             | 1.00              | 375         | 343             | 52.2 | 0.22  | 0.38  |
| 85 | rs11168314 | DIL6299 | 1F+6225  | 46,616,896    | intron                | T/C     | 21.0             | 0.12              | 226         | 222             | 50.4 | 0.85  | 0.54  |
| 86 | rs10875708 | DIL4847 | 1F+3103  | 46,620,017    | intron                | C/T     | 78.8             | 0.76              | 261         | 265             | 49.6 | 0.86  | 0.97  |
| 87 | rs4303288  | DIL1316 | 1F+234   | 46,622,886    | intron                | G/T     | 60.4             | 0.66              | 372         | 312             | 54.4 | 0.02  | 0.01  |
| 88 | rs4073729  | DIL1317 | 1F-217   | 46,623,336    | telomeric to VDR gene | C/T     | 84.7             | 0.53              | 222         | 197             | 53.0 | 0.26  | 0.52  |
| 89 | rs4073726  | DIL1318 | 1F-465   | 46,623,584    | telomeric to VDR gene | C/G     | 44.9             | 0.12              | 430         | 387             | 52.6 | 0.14  | 0.21  |
| 90 | rs12721378 | DIL1319 | 1F-532   | 46,623,651    | telomeric to VDR gene | C/G     | 98.9             | 0.09              | 16          | 16              | 50.0 | 1.00  | 1.00  |
| 91 | rs3923693  | DIL1320 | 1F-777   | 46,623,896    | telomeric to VDR gene | A/G     | 87.8             | 0.76              | 166         | 177             | 48.4 | 0.56  | 0.84  |
| 92 | rs1015390  | DIL6325 | 1F-7196  | 46,630,305    | telomeric to VDR gene | A/G     | 84.4             | 0.69              | 227         | 202             | 52.9 | 0.26  | 0.33  |
| 93 | rs4760674  | DIL6305 | 1F-20173 | 46,643,281    | telomeric to VDR gene | T/G     | 64.2             | 0.59              | 357         | 382             | 48.3 | 0.35  | 0.05  |
| 94 | rs6823     | DIL5006 | 1F-25571 | 46,648,679    | telomeric to VDR gene | C/G     | 55.2             | 0.14              | 615         | 627             | 49.5 | 0.74  | 0.57  |
| 95 | rs10875712 | DIL5007 | 1F-26412 | 46,649,520    | telomeric to VDR gene | C/G     | 64.8             | 0.46              | 578         | 595             | 49.3 | 0.62  | 0.68  |
| 96 | rs2071358  | DIL5008 | 1F-29607 | 46,652,716    | telomeric to VDR gene | A/C     | 18.2             | 1.00              | 384         | 361             | 51.5 | 0.39  | 0.66  |
| 97 | rs2070739  | DIL5009 | 1F-31134 | 46,654,243    | telomeric to VDR gene | G/A     | 9.2              | 0.22              | 228         | 199             | 53.4 | 0.18  | 0.28  |
| 98 | rs12721379 | DIL5010 | 1F-31243 | 46,654,352    | telomeric to VDR gene | C/T     | 0.9              | 1.00              | 22          | 25              | 46.8 | 0.68  | 0.68  |
